# Supplementary material for: Health systems’ preparedness to provide post-abortion care: assessment of health facilities in Burkina Faso, Kenya and Nigeria
Source: Springer Nature journal article supplement (doi:10.1186/s12913-022-07873-y), 2022-04-22

**Supplimentary File 1**

**Signal Functions Assessment Tool**

Interviewer information

|                         |   |   |   |   |   |   |   |                      |  |  |  |                 |  |                        |   |   |   |   |     |   |
|-------------------------|---|---|---|---|---|---|---|----------------------|--|--|--|-----------------|--|------------------------|---|---|---|---|-----|---|
| Date of Data collection |   |   |   |   |   |   |   | Name of Investigator |  |  |  | Investigator ID |  | Time interview started |   |   |   |   |     |   |
| D                       | D | / | M | M | / | Y | Y |                      |  |  |  |                 |  | H                      | H | : | M | M | A/P | M |

|                        |  |  |  |                      |  |  |  |                                               |  |  |  |
|------------------------|--|--|--|----------------------|--|--|--|-----------------------------------------------|--|--|--|
| 1. Name of Facility    |  |  |  | 2. Level of facility |  |  |  | 3. Ward                                       |  |  |  |
|                        |  |  |  |                      |  |  |  |                                               |  |  |  |
| 4. County/State/Region |  |  |  |                      |  |  |  | 5. GPS coordinates (For in-person interviews) |  |  |  |
|                        |  |  |  |                      |  |  |  |                                               |  |  |  |

| Type of health facility          | Tick one                 | Operating agency                                                                                               | Tick one                 |
|----------------------------------|--------------------------|----------------------------------------------------------------------------------------------------------------|--------------------------|
| A. Tertiary hospital (Level 3)   | <input type="checkbox"/> | 1. Government                                                                                                  | <input type="checkbox"/> |
| B. Provincial hospital (Level 2) | <input type="checkbox"/> | 2. Privately owned (CIRCLE TYPE: 1. NGO 2. Religious body 3.private for profit 4. Industrial (Mine hospitals)) | <input type="checkbox"/> |
| C. District hospital (Level 1)   | <input type="checkbox"/> |                                                                                                                |                          |
| D. Health centre                 | <input type="checkbox"/> | 3. Other (please indicate) _____                                                                               | <input type="checkbox"/> |
| E. Health post                   | <input type="checkbox"/> | 4. Other (please indicate) _____                                                                               | <input type="checkbox"/> |
| F. Other (please indicate) _____ | <input type="checkbox"/> |                                                                                                                |                          |

| STAFF available at facility (In LEVEL 3 hospitals fill this in for the gynaecologic/obstetric emergency ward where patients are managed. FOR all other fill it in for the whole hospital) | Work hours                                               | Circle the appropriate answer             |
|-------------------------------------------------------------------------------------------------------------------------------------------------------------------------------------------|----------------------------------------------------------|-------------------------------------------|
| How many obstetricians are registered to work at this facility normally?                                                                                                                  | <input type="text"/>                                     | Is the facility open on:                  |
| How many obstetricians are present at this facility right now?                                                                                                                            | <input type="text"/>                                     | Monday (Circle the appropriate answer)    |
| How many obstetricians are on call overnight everyday?                                                                                                                                    | <input type="text"/>                                     | Tuesday (Circle the appropriate answer)   |
|                                                                                                                                                                                           |                                                          | Wednesday (Circle the appropriate answer) |
|                                                                                                                                                                                           |                                                          | Thursday (Circle the appropriate answer)  |
|                                                                                                                                                                                           |                                                          | Friday (Circle the appropriate answer)    |
|                                                                                                                                                                                           |                                                          | Saturday (Circle the appropriate answer)  |
|                                                                                                                                                                                           |                                                          | Sunday (Circle the appropriate answer)    |
| Is there an obstetrician present for 24 hours everyday?                                                                                                                                   | <input type="checkbox"/> Yes <input type="checkbox"/> No | Is it open for 24 hours on:               |
| How many other doctors (MBBS) are registered to work at this facility normally?                                                                                                           | <input type="text"/>                                     | Monday (Circle the appropriate answer)    |
| How many other doctors (MBBS) are present at this facility right now?                                                                                                                     | <input type="text"/>                                     | Tuesday (Circle the appropriate answer)   |
|                                                                                                                                                                                           |                                                          | Wednesday (Circle the appropriate answer) |
|                                                                                                                                                                                           |                                                          | Thursday (Circle the appropriate answer)  |
|                                                                                                                                                                                           |                                                          | Friday (Circle the appropriate answer)    |

|                                                                                                                                         |                                                          |                                              |                              |                             |
|-----------------------------------------------------------------------------------------------------------------------------------------|----------------------------------------------------------|----------------------------------------------|------------------------------|-----------------------------|
|                                                                                                                                         |                                                          | Saturday (Circle the appropriate answer)     | <input type="checkbox"/> Yes | <input type="checkbox"/> No |
|                                                                                                                                         |                                                          | Sunday (Circle the appropriate answer)       | <input type="checkbox"/> Yes | <input type="checkbox"/> No |
| How many other doctors (MBBS) are on call overnight everyday?                                                                           | <input type="text"/>                                     | Is family planning provided on:              |                              |                             |
| Are there any other doctors (MBBS) present for 24 hours everyday?                                                                       | <input type="checkbox"/> Yes <input type="checkbox"/> No | Monday (Circle the appropriate answer)       | <input type="checkbox"/> Yes | <input type="checkbox"/> No |
|                                                                                                                                         |                                                          | Tuesday (Circle the appropriate answer)      | <input type="checkbox"/> Yes | <input type="checkbox"/> No |
|                                                                                                                                         |                                                          | Wednesday (Circle the appropriate answer)    | <input type="checkbox"/> Yes | <input type="checkbox"/> No |
|                                                                                                                                         |                                                          | Thursday (Circle the appropriate answer)     | <input type="checkbox"/> Yes | <input type="checkbox"/> No |
|                                                                                                                                         |                                                          | Friday (Circle the appropriate answer)       | <input type="checkbox"/> Yes | <input type="checkbox"/> No |
|                                                                                                                                         |                                                          | Saturday (Circle the appropriate answer)     | <input type="checkbox"/> Yes | <input type="checkbox"/> No |
|                                                                                                                                         |                                                          | Sunday (Circle the appropriate answer)       | <input type="checkbox"/> Yes | <input type="checkbox"/> No |
| How many clinical officers are present at this facility right now?                                                                      | <input type="text"/>                                     | Is family planning provided for 24 hours on: |                              |                             |
|                                                                                                                                         |                                                          | Monday (Circle the appropriate answer)       | <input type="checkbox"/> Yes | <input type="checkbox"/> No |
|                                                                                                                                         |                                                          | Tuesday (Circle the appropriate answer)      | <input type="checkbox"/> Yes | <input type="checkbox"/> No |
|                                                                                                                                         |                                                          | Wednesday (Circle the appropriate answer)    | <input type="checkbox"/> Yes | <input type="checkbox"/> No |
|                                                                                                                                         |                                                          | Thursday (Circle the appropriate answer)     | <input type="checkbox"/> Yes | <input type="checkbox"/> No |
|                                                                                                                                         |                                                          | Friday (Circle the appropriate answer)       | <input type="checkbox"/> Yes | <input type="checkbox"/> No |
|                                                                                                                                         |                                                          | Saturday (Circle the appropriate answer)     | <input type="checkbox"/> Yes | <input type="checkbox"/> No |
|                                                                                                                                         |                                                          | Sunday (Circle the appropriate answer)       | <input type="checkbox"/> Yes | <input type="checkbox"/> No |
| How many clinical officers are on call overnight everyday?                                                                              | <input type="checkbox"/> Yes <input type="checkbox"/> No |                                              |                              |                             |
| Is there a clinical officer present for 24 hours everyday?                                                                              | <input type="text"/>                                     |                                              |                              |                             |
| How many midwives/nurses are registered to work at this facility normally?                                                              | <input type="text"/>                                     |                                              |                              |                             |
| How many midwives/nurses are present at this facility right now?                                                                        | <input type="text"/>                                     |                                              |                              |                             |
| How many midwives/nurses are on call overnight everyday?                                                                                | <input type="text"/>                                     |                                              |                              |                             |
| Is there a midwife/nurse present for 24 hours everyday?                                                                                 | <input type="checkbox"/> Yes <input type="checkbox"/> No |                                              |                              |                             |
| How many anaesthetists are registered to work at this facility normally?                                                                | <input type="text"/>                                     |                                              |                              |                             |
| How many anaesthetists are present at this facility right now?                                                                          | <input type="text"/>                                     |                                              |                              |                             |
| How many anaesthetists are on call overnight everyday?                                                                                  | <input type="text"/>                                     |                                              |                              |                             |
| Is there an anaesthetists present for 24 hours everyday?                                                                                | <input type="checkbox"/> Yes <input type="checkbox"/> No |                                              |                              |                             |
| Is there any other cadre of health professional with comprehensive abortion care training registered to work at this facility normally? | <input type="checkbox"/> Yes <input type="checkbox"/> No |                                              |                              |                             |
| What are the other cadres of health professionals who provide comprehensive abortion care at this facility?                             | <input type="text"/>                                     |                                              |                              |                             |
| 1. _____                                                                                                                                | <input type="text"/>                                     |                                              |                              |                             |
| 2. _____                                                                                                                                | <input type="text"/>                                     |                                              |                              |                             |
| 3. _____                                                                                                                                | <input type="text"/>                                     |                                              |                              |                             |
| How many other cadre of health professional with comprehensive abortion care                                                            | <input type="text"/>                                     |                                              |                              |                             |

|                                                                                                                               |                          |                                                          |
|-------------------------------------------------------------------------------------------------------------------------------|--------------------------|----------------------------------------------------------|
| training are registered to work at this facility normally?                                                                    | <input type="checkbox"/> |                                                          |
| How many other cadre of health professional with comprehensive abortion care training are present at this facility right now? | <input type="checkbox"/> |                                                          |
| How many other cadre of health professional with comprehensive abortion care training are on call overnight everyday?         | <input type="checkbox"/> |                                                          |
| Is there any other cadre of health professional with comprehensive abortion care training present for 24 hours everyday?      | <input type="checkbox"/> |                                                          |
| Name of respondent to this section: _____                                                                                     |                          | Position of respondent to this section in facility _____ |

**Instructions**

**Answer the following questions about signal functions in this facility related to emergency obstetric care including abortion/post abortion care by interviewing the health workers in the gynaecology ward/Emergency room/family planning clinic and other departments; reviewing facility registers; and observation (as much as possible).**

**Record whether the function has been carried out in the last 3 months. If not, indicate why it has not been performed using the categories given below. Then record whether it has been done in the past 12 months.**

**Categories of answers for non-performance of a function**

- |    |                                                                                                                                                                                   |
|----|-----------------------------------------------------------------------------------------------------------------------------------------------------------------------------------|
| A. | No health workers available<br>1 Health workers required for this function are not sufficient or available at all                                                                 |
| B. | No trained health workers<br>1 The authorized staff are available but untrained<br>2 They are trained but not confident enough to perform the function                            |
| C. | No equipment (e.g. machines/beds)<br>1 Large equipment are not available e.g. machines, beds                                                                                      |
| D. | No commodities/supplies<br>1 Drugs/family planning commodities needed are not available                                                                                           |
| E. | Against hospital/management policies<br>2 The procedure is against managements policies<br>3 Staff are encouraged to do other procedures for some reason<br>4 Lack of supervision |
| F. | No cases requiring this procedure<br>1 No client needing this function has come to the facility in this period (Not necessary).                                                   |
| G. | Against the workers morals/ethics<br>2 Staff are morally or ethically uncomfortable with the procedure                                                                            |

**SECTION 1**

|                                                                          |                                                            |                                                                                                                                                                                                                                                                                                                                                                                                                                                 |
|--------------------------------------------------------------------------|------------------------------------------------------------|-------------------------------------------------------------------------------------------------------------------------------------------------------------------------------------------------------------------------------------------------------------------------------------------------------------------------------------------------------------------------------------------------------------------------------------------------|
| <p><b>Q.</b></p> <p>1</p> <p><b>Pregnancy testing</b></p>                | <p><b>A. Can your facility perform this procedure?</b></p> | <p><b>YES</b>.....skip to 1B</p> <p><b>NO</b></p> <p><b>WHY not?</b></p> <p><b>(circle all answers indicated)</b> .....then skip to 2A</p> <p>A. No health workers available</p> <p>B. No trained health workers</p> <p>C. No equipment e.g. machines or beds</p> <p>D. No commodities or supplies</p> <p>E. Against hospital or management policies</p> <p>F. No cases requiring the procedure</p> <p>G. Against the workers morals/ethics</p> |
| <p>2</p> <p><b>Parenteral administration of antibiotics to women</b></p> |                                                            | <p><b>YES</b>.....skip to 2B</p> <p><b>NO</b></p> <p><b>WHY not?</b></p> <p><b>(circle all answers indicated)</b> .....then skip to 3A</p> <p>1. No health workers available</p> <p>2. No trained health workers</p> <p>3. No equipment e.g. machines or beds</p> <p>4. No commodities or supplies</p> <p>5. Against hospital or management policies</p> <p>6. No cases requiring the procedure</p> <p>7. Against the workers morals/ethics</p> |
| <p>3</p> <p><b>Administration of uterotonic oxytocics</b></p>            |                                                            | <p><b>YES</b>.....skip to 3B</p> <p><b>NO</b></p> <p><b>WHY not?</b></p> <p><b>(circle all answers indicated)</b> ..... then Skip to 4A</p> <p>A. No health workers available</p> <p>B. No trained health workers</p> <p>C. No equipment e.g. machines or beds</p> <p>D. No commodities or supplies</p> <p>E. Against hospital or management policies</p>                                                                                       |

|   |                                                                               |                                                                                                                                                                                                                                                                                                                                                                                                                  |
|---|-------------------------------------------------------------------------------|------------------------------------------------------------------------------------------------------------------------------------------------------------------------------------------------------------------------------------------------------------------------------------------------------------------------------------------------------------------------------------------------------------------|
|   |                                                                               | <p>F. No cases requiring the procedure<br/>G. Against the workers morals/ethics</p>                                                                                                                                                                                                                                                                                                                              |
| 4 | Administration of IV fluids to woman                                          | <p><b>YES</b>..... 4B</p> <p><b>NO</b><br/><b>WHY not?</b><br/><i>(circle all answers indicated)</i> .....then Skip to 5A</p> <p>A. No health workers available<br/>B. No trained health workers<br/>C. No equipment e.g. machines or beds<br/>D. No commodities or supplies<br/>E. Against hospital or management policies<br/>F. No cases requiring the procedure<br/>G. Against the workers morals/ethics</p> |
| 5 | Administer parenteral anticonvulsants                                         | <p><b>YES</b>..... 5B</p> <p><b>NO</b><br/><b>WHY not?</b><br/><i>(circle all answers indicated)</i> .....then Skip to 6A</p> <p>1. No health workers available<br/>2. No trained health workers<br/>3. No equipment e.g. machines or beds<br/>4. No commodities or supplies<br/>5. Against hospital or management policies<br/>6. No cases requiring the procedure<br/>7. Against the workers morals/ethics</p> |
| 6 | Use partographs to monitor and manage labour                                  | <p><b>YES</b>..... 6B</p> <p><b>NO</b><br/><b>WHY not?</b><br/><i>(circle all answers indicated)</i> .....then Skip to 7A</p> <p>A. No health workers available<br/>B. No trained health workers<br/>C. No equipment e.g. machines or beds<br/>D. No commodities or supplies<br/>E. Against hospital or management policies<br/>F. No cases requiring the procedure<br/>G. Against the workers morals/ethics</p> |
| 7 | Perform active management of third stage of labour routine for all deliveries | <p><b>YES</b>..... 8A</p> <p><b>NO</b><br/><b>WHY not?</b><br/><i>(circle all answers indicated)</i> .....then Skip to 8A</p> <p>A. No health workers available<br/>B. No trained health workers</p>                                                                                                                                                                                                             |













|                                                                                                                                           |                                                                                                                                                                                                                                                                                                                                                                                                                                                                                              |
|-------------------------------------------------------------------------------------------------------------------------------------------|----------------------------------------------------------------------------------------------------------------------------------------------------------------------------------------------------------------------------------------------------------------------------------------------------------------------------------------------------------------------------------------------------------------------------------------------------------------------------------------------|
| <p>Hygienic cord care (cut with sterile item and apply disinfectant to tip and stump, and no application of other substances) for all</p> | <p><b>NO</b><br/> <b>WHY not?</b><br/> <i>(circle all answers indicated)</i> .....then Skip to 21A</p> <ul style="list-style-type: none"> <li>A. No health workers available</li> <li>B. No trained health workers</li> <li>C. No equipment e.g. machines or beds</li> <li>D. No commodities or supplies</li> <li>E. Against hospital or management policies</li> <li>F. No cases requiring the procedure</li> <li>G. Against the workers morals/ethics</li> </ul>                           |
| <p>21 Thermal protection (drying baby immediately after birth and wrapping) for all (or say routinely)</p>                                | <p><b>YES</b>..... 21</p> <p><b>NO</b><br/> <b>WHY not?</b><br/> <i>(circle all answers indicated)</i> .....then Skip to 22A</p> <ul style="list-style-type: none"> <li>A. No health workers available</li> <li>B. No trained health workers</li> <li>C. No equipment e.g. machines or beds</li> <li>D. No commodities or supplies</li> <li>E. Against hospital or management policies</li> <li>F. No cases requiring the procedure</li> <li>G. Against the workers morals/ethics</li> </ul> |
| <p>22 Administer IV fluids to baby</p>                                                                                                    | <p><b>YES</b>..... 21B</p> <p><b>NO</b><br/> <b>WHY not?</b><br/> <i>(circle all answers indicated)</i> .....then Skip to 4A</p> <ul style="list-style-type: none"> <li>A. No health workers available</li> <li>B. No trained health workers</li> <li>C. No equipment e.g. machines or beds</li> <li>D. No commodities or supplies</li> <li>E. Against hospital or management policies</li> <li>F. No cases requiring the procedure</li> <li>G. Against the workers morals/ethics</li> </ul> |
| <p>23 Resuscitate newborn with bag and mask</p>                                                                                           | <p><b>YES</b>..... 22B</p> <p><b>NO</b><br/> <b>WHY not?</b><br/> <i>(circle all answers indicated)</i> .....then Skip to 4A</p> <ul style="list-style-type: none"> <li>A. No health workers available</li> <li>B. No trained health workers</li> <li>C. No equipment e.g. machines or beds</li> <li>D. No commodities or supplies</li> <li>E. Against hospital or management policies</li> <li>F. No cases requiring the procedure</li> <li>G. Against the workers morals/ethics</li> </ul> |
| <p>24</p>                                                                                                                                 | <p><b>YES</b>..... 23B</p> <p><b>NO</b><br/> <b>WHY not?</b></p>                                                                                                                                                                                                                                                                                                                                                                                                                             |

|                                                                             |                                                                                                                                                                                                                                                                                                                                                                                                                                                                                            |
|-----------------------------------------------------------------------------|--------------------------------------------------------------------------------------------------------------------------------------------------------------------------------------------------------------------------------------------------------------------------------------------------------------------------------------------------------------------------------------------------------------------------------------------------------------------------------------------|
| <p>Administer corticosteroids in preterm labour</p>                         | <p><b>(circle all answers indicated)</b> .....then Skip to 4A</p> <ol style="list-style-type: none"> <li>1. No health workers available</li> <li>2. No trained health workers</li> <li>3. No equipment e.g. machines or beds</li> <li>4. No commodities or supplies</li> <li>5. Against hospital or management policies</li> <li>6. No cases requiring the procedure</li> <li>7. Against the workers morals/ethics</li> </ol>                                                              |
| <p>25<br/>Provide Kangaroo mother care for preterm or very small babies</p> | <p><b>YES</b>..... 24B</p> <p><b>NO</b><br/><b>WHY not?</b><br/><b>(circle all answers indicated)</b> .....then Skip to 4A</p> <ol style="list-style-type: none"> <li>A. No health workers available</li> <li>B. No trained health workers</li> <li>C. No equipment e.g. machines or beds</li> <li>D. No commodities or supplies</li> <li>E. Against hospital or management policies</li> <li>F. No cases requiring the procedure</li> <li>G. Against the workers morals/ethics</li> </ol> |
| <p>26<br/>Provide alternative feeding if baby cannot breastfeed</p>         | <p><b>YES</b>..... 25B</p> <p><b>NO</b><br/><b>WHY not?</b><br/><b>(circle all answers indicated)</b> .....then Skip to 4A</p> <ol style="list-style-type: none"> <li>A. No health workers available</li> <li>B. No trained health workers</li> <li>C. No equipment e.g. machines or beds</li> <li>D. No commodities or supplies</li> <li>E. Against hospital or management policies</li> <li>F. No cases requiring the procedure</li> <li>G. Against the workers morals/ethics</li> </ol> |
| <p>27<br/>Adminster oxygen to baby</p>                                      | <p><b>YES</b>..... 26B</p> <p><b>NO</b><br/><b>WHY not?</b><br/><b>(circle all answers indicated)</b> .....then Skip to 4A</p> <ul style="list-style-type: none"> <li>· No health workers available</li> <li>· No trained health workers</li> <li>· No equipment e.g. machines or beds</li> <li>· No commodities or supplies</li> <li>· Against hospital or management policies</li> <li>· No cases requiring the procedure</li> <li>· Against the workers morals/ethics</li> </ul>        |
| <p>28</p>                                                                   | <p><b>YES</b>..... 27B</p> <p><b>Where is the primary source of the blood supplied?</b></p> <p>Central blood bank.....1</p>                                                                                                                                                                                                                                                                                                                                                                |

|                                                                                                                                 |                                                                                                                                                                                                                                                                                                                                                                                                                                                                                                                     |
|---------------------------------------------------------------------------------------------------------------------------------|---------------------------------------------------------------------------------------------------------------------------------------------------------------------------------------------------------------------------------------------------------------------------------------------------------------------------------------------------------------------------------------------------------------------------------------------------------------------------------------------------------------------|
| <p>Blood Transfusion</p>                                                                                                        | <p>The facility has a blood bank.....2<br/>         Direct transfusion from a family member....3<br/>         Other (specify)_____ 4</p>                                                                                                                                                                                                                                                                                                                                                                            |
|                                                                                                                                 | <p><b>NO</b><br/> <b>WHY not?</b><br/> <i>(circle all answers indicated)</i> .....then <b>Skip to 10A</b></p> <ul style="list-style-type: none"> <li>A. No health workers available</li> <li>B. No trained health workers</li> <li>C. No equipment e.g. machines or beds</li> <li>D. No commodities or supplies</li> <li>E. Against hospital or management policies</li> <li>F. No cases requiring the procedure</li> <li>G. Against the workers morals/ethics</li> </ul>                                           |
| <p>29</p> <p>Surgical procedure to manage abortion complications e.g. laparotomy/laparoscopy/hysterectomy?</p>                  | <p><b>YES</b>.....<b>Skip to 28B</b></p> <p><b>NO</b><br/> <b>WHY not?</b><br/> <i>(circle all answers indicated)</i> .....<b>Skip to Section 2</b></p> <ul style="list-style-type: none"> <li>A. No health workers available</li> <li>B. No trained health workers</li> <li>C. No equipment e.g. machines or beds</li> <li>D. No commodities or supplies</li> <li>E. Against hospital or management policies</li> <li>F. No cases requiring the procedure</li> <li>G. Against the workers morals/ethics</li> </ul> |
| <p><b>Name of respondent to this section:</b> _____</p> <p><b>Position of respondent to this section in facility:</b> _____</p> |                                                                                                                                                                                                                                                                                                                                                                                                                                                                                                                     |

**B. Has your facility done this in the past 3 months?**

**YES**.....skip to 2A

**NO** .....skip 1C

**WHY not?**

*(circle all answers indicated)*

- A. No health workers available
- B. No trained health workers
- C. No equipment e.g. machines or beds
- D. No commodities or supplies
- E. Against hospital or management policies
- F. No cases requiring the procedure
- G. Against the workers morals/ethics

**C. Has your facility done this in the past 12 months?**

**YES**.....skip to 2A

**NO**

**WHY not?**

*(circle all answers indicated)*

- A. No health workers available
- B. No trained health workers
- C. No equipment e.g. machines or beds
- D. No commodities or supplies
- E. Against hospital or management policies
- F. No cases requiring the procedure
- G. Against the workers morals/ethics

**YES**.....skip to 3A

**NO** .....skip 2C

**WHY not?**

*(circle all answers indicated)*

- 1. No health workers available
- 2. No trained health workers
- 3. No equipment e.g. machines or beds
- 4. No commodities or supplies
- 5. Against hospital or management policies
- 6. No cases requiring the procedure
- 7. Against the workers morals/ethics

**YES**.....skip to 3A

**NO**

**WHY not?**

*(circle all answers indicated)*

- 1. No health workers available
- 2. No trained health workers
- 3. No equipment e.g. machines or beds
- 4. No commodities or supplies
- 5. Against hospital or management policies
- 6. No cases requiring the procedure
- 7. Against the workers morals/ethics

**YES**.....Skip to 4A

**NO** .....Skip to 3C

**WHY not?**

*(circle all answers indicated)*

- A. No health workers available
- B. No trained health workers
- C. No equipment e.g. machines or beds
- D. No commodities or supplies
- E. Against hospital or management policies

**YES**.....Skip to 4A

**NO**

**WHY not?**

*(circle all answers indicated)*

- A. No health workers available
- B. No trained health workers
- C. No equipment e.g. machines or beds
- D. No commodities or supplies
- E. Against hospital or management policies

- F. No cases requiring the procedure
- G. Against the workers morals/ethics

- F. No cases requiring the procedure
- G. Against the workers morals/ethics

**YES**.....Skip to 5A

**NO**.....skip to 4C

**WHY not?**

*(circle all answers indicated)*

- A. No health workers available
- B. No trained health workers
- C. No equipment e.g. machines or beds
- D. No commodities or supplies
- E. Against hospital or management policies
- F. No cases requiring the procedure
- G. Against the workers morals/ethics

**YES**.....Skip to 5A

**NO**

**WHY not?**

*(circle all answers indicated)*

- A. No health workers available
- B. No trained health workers
- C. No equipment e.g. machines or beds
- D. No commodities or supplies
- E. Against hospital or management policies
- F. No cases requiring the procedure
- G. Against the workers morals/ethics

**YES**.....Skip to 6A

**NO**.....skip to 5C

**WHY not?**

*(circle all answers indicated)*

- 1. No health workers available
- 2. No trained health workers
- 3. No equipment e.g. machines or beds
- 4. No commodities or supplies
- 5. Against hospital or management policies
- 6. No cases requiring the procedure
- 7. Against the workers morals/ethics

**YES**.....Skip to 6A

**NO**

**WHY not?**

*(circle all answers indicated)*

- 1. No health workers available
- 2. No trained health workers
- 3. No equipment e.g. machines or beds
- 4. No commodities or supplies
- 5. Against hospital or management policies
- 6. No cases requiring the procedure
- 7. Against the workers morals/ethics

**YES**.....Skip to 7A

**NO**.....skip to 6C

**WHY not?**

*(circle all answers indicated)*

- A. No health workers available
- B. No trained health workers
- C. No equipment e.g. machines or beds
- D. No commodities or supplies
- E. Against hospital or management policies
- F. No cases requiring the procedure
- G. Against the workers morals/ethics

**YES**.....Skip to 7A

**NO**

**WHY not?**

*(circle all answers indicated)*

- A. No health workers available
- B. No trained health workers
- C. No equipment e.g. machines or beds
- D. No commodities or supplies
- E. Against hospital or management policies
- F. No cases requiring the procedure
- G. Against the workers morals/ethics

YES.....Skip to 9A

NO.....skip to 8C

WHY not?

*(circle all answers indicated)*

- A. No health workers available
- B. No trained health workers
- C. No equipment e.g. machines or beds
- D. No commodities or supplies
- E. Against hospital or management policies
- F. No cases requiring the procedure
- G. Against the workers morals/ethics

YES.....Skip to 9A

NO

WHY not?

*(circle all answers indicated)*

- A. No health workers available
- B. No trained health workers
- C. No equipment e.g. machines or beds
- D. No commodities or supplies
- E. Against hospital or management policies
- F. No cases requiring the procedure
- G. Against the workers morals/ethics

YES.....skip to 10A

NO .....skip to 9C

WHY not?

*(circle all answers indicated)*

- 1. No health workers available
- 2. No trained health workers
- 3. No equipment e.g. machines or beds
- 4. No commodities or supplies
- 5. Against hospital or management policies
- 6. No cases requiring the procedure
- 7. Against the workers morals/ethics

YES.....skip to 10A

NO

WHY not?

*(circle all answers indicated)*

- 1. No health workers available
- 2. No trained health workers
- 3. No equipment e.g. machines or beds
- 4. No commodities or supplies
- 5. Against hospital or management policies
- 6. No cases requiring the procedure
- 7. Against the workers morals/ethics

YES.....skip to 11A

NO.....Skip to 10C

WHY not?

*(circle all answers indicated)*

- 1. No health workers available
- 2. No trained health workers
- 3. No equipment e.g. machines or beds

YES.....skip to 11A

NO

WHY not?

*(circle all answers indicated)*

- 1. No health workers available
- 2. No trained health workers
- 3. No equipment e.g. machines or beds



- 4. No commodities or supplies
- 5. Against hospital or management policies
- 6. No cases requiring the procedure
- 7. Against the workers morals/ethics

- 4. No commodities or supplies
- 5. Against hospital or management policies
- 6. No cases requiring the procedure
- 7. Against the workers morals/ethics

**YES**.....Skip to 12A

**NO** .....Skip to 11C

**WHY not?**

***(circle all answers indicated)***

- A. No health workers available
- B. No trained health workers
- C. No equipment e.g. machines or beds
- D. No commodities or supplies
- E. Against hospital or management policies
- F. No cases requiring the procedure
- G. Against the workers morals/ethics

**YES**.....Skip to 12A

**NO**

**WHY not?**

***(circle all answers indicated)***

- A. No health workers available
- B. No trained health workers
- C. No equipment e.g. machines or beds
- D. No commodities or supplies
- E. Against hospital or management policies
- F. No cases requiring the procedure
- G. Against the workers morals/ethics

**YES**.....Skip to 13A

**NO**.....Skip to 12C

**WHY not?**

***(circle all answers indicated)***

- A. No health workers available
- B. No trained health workers
- C. No equipment e.g. machines or beds
- D. No commodities or supplies
- E. Against hospital or management policies
- F. No cases requiring the procedure

**YES**.....Skip to 13A

**NO**

**WHY not?**

***(circle all answers indicated)***

- 1. No health workers available
- 2. No trained health workers
- 3. No equipment e.g. machines or beds
- 4. No commodities or supplies
- 5. Against hospital or management policies
- 6. No cases requiring the procedure

G. Against the workers morals/ethics

Against the workers morals/ethics

YES.....Skip to 14A

YES.....Skip to 14A

NO .....Skip to 13C

NO

WHY not?

WHY not?

*(circle all answers indicated)*

*(circle all answers indicated)*

- A. No health workers available
- B. No trained health workers
- C. No equipment e.g. machines or beds
- D. No commodities or supplies
- E. Against hospital or management policies
- F. No cases requiring the procedure
- G. Against the workers morals/ethics

- 1. No health workers available
- 2. No trained health workers
- 3. No equipment e.g. machines or beds
- 4. No commodities or supplies
- 5. Against hospital or management policies
- 6. No cases requiring the procedure
- 7. Against the workers morals/ethics

YES.....Skip to 15A

YES.....Skip to 15A

NO.....Skip to 14C

NO

WHY not?

WHY not?

*(circle all answers indicated)*

*(circle all answers indicated)*

- A. No health workers available

- 1. No health workers available

- B. No trained health workers
- C. No equipment e.g. machines or beds
- D. No commodities or supplies
- E. Against hospital or management policies
- F. No cases requiring the procedure
- G. Against the workers morals/ethics

- 2. No trained health workers
- 3. No equipment e.g. machines or beds
- 4. No commodities or supplies
- 5. Against hospital or management policies
- 6. No cases requiring the procedure
- 7. Against the workers morals/ethics

**YES**.....Skip to 16A

**NO** .....Skip to 15C

**WHY not?**

*(circle all answers indicated)*

- A. No health workers available
- B. No trained health workers
- C. No equipment e.g. machines or beds
- D. No commodities or supplies
- E. Against hospital or management policies
- F. No cases requiring the procedure
- G. Against the workers morals/ethics

**YES**.....Skip to 16A

**NO**

**WHY not?**

*(circle all answers indicated)*

- 1. No health workers available
- 2. No trained health workers
- 3. No equipment e.g. machines or beds
- 4. No commodities or supplies
- 5. Against hospital or management policies
- 6. No cases requiring the procedure
- 7. Against the workers morals/ethics

**YES**.....skip to 17A

**NO** .....Skip to 176C

**WHY not?**

*(circle all answers indicated)*

- 1. No health workers available
- 2. No trained health workers
- 3. No equipment e.g. machines or beds
- 4. No commodities or supplies

**YES**.....skip to 17A

**NO**

**WHY not?**

*(circle all answers indicated)*

- 1. No health workers available
- 2. No trained health workers
- 3. No equipment e.g. machines or beds
- 4. No commodities or supplies

- 5. Against hospital or management policies
- 6. No cases requiring the procedure
- 7. Against the workers morals/ethics

- 5. Against hospital or management policies
- 6. No cases requiring the procedure
- 7. Against the workers morals/ethics

**YES**.....skip to 18A  
**NO** .....skip to 17C

**WHY not?**

***(circle all answers indicated)***

- A. No health workers available
- B. No trained health workers
- C. No equipment e.g. machines or beds
- D. No commodities or supplies
- E. Against hospital or management policies
- F. No cases requiring the procedure
- G. Against the workers morals/ethics

**YES**.....skip to 18A  
**NO**

**WHY not?**

***(circle all answers indicated)***

- 1. No health workers available
- 2. No trained health workers
- 3. No equipment e.g. machines or beds
- 4. No commodities or supplies
- 5. Against hospital or management policies
- 6. No cases requiring the procedure
- 7. Against the workers morals/ethics

|                                                                                                                                                                                                                                                                                                                                                                                                                                                                                                 |                                                                                                                                                                                                                                                                                                                                                                                                                                                                                 |
|-------------------------------------------------------------------------------------------------------------------------------------------------------------------------------------------------------------------------------------------------------------------------------------------------------------------------------------------------------------------------------------------------------------------------------------------------------------------------------------------------|---------------------------------------------------------------------------------------------------------------------------------------------------------------------------------------------------------------------------------------------------------------------------------------------------------------------------------------------------------------------------------------------------------------------------------------------------------------------------------|
|                                                                                                                                                                                                                                                                                                                                                                                                                                                                                                 |                                                                                                                                                                                                                                                                                                                                                                                                                                                                                 |
|                                                                                                                                                                                                                                                                                                                                                                                                                                                                                                 |                                                                                                                                                                                                                                                                                                                                                                                                                                                                                 |
| <p><b>YES</b>.....Skip to 22A</p> <p><b>NO</b>.....skip to 21C</p> <p><b>WHY not?</b><br/><i>(circle all answers indicated)</i></p> <ol style="list-style-type: none"> <li>1. No health workers available</li> <li>2. No trained health workers</li> <li>3. No equipment e.g. machines or beds</li> <li>4. No commodities or supplies</li> <li>5. Against hospital or management policies</li> <li>6. No cases requiring the procedure</li> <li>7. Against the workers morals/ethics</li> </ol> | <p><b>YES</b>.....Skip to 22A</p> <p><b>NO</b></p> <p><b>WHY not?</b><br/><i>(circle all answers indicated)</i></p> <ol style="list-style-type: none"> <li>1. No health workers available</li> <li>2. No trained health workers</li> <li>3. No equipment e.g. machines or beds</li> <li>4. No commodities or supplies</li> <li>5. Against hospital or management policies</li> <li>6. No cases requiring the procedure</li> <li>7. Against the workers morals/ethics</li> </ol> |
| <p><b>YES</b>.....Skip to 23A</p> <p><b>NO</b>.....skip to 22C</p> <p><b>WHY not?</b><br/><i>(circle all answers indicated)</i></p> <ol style="list-style-type: none"> <li>A. No health workers available</li> <li>B. No trained health workers</li> <li>C. No equipment e.g. machines or beds</li> <li>D. No commodities or supplies</li> <li>E. Against hospital or management policies</li> <li>F. No cases requiring the procedure</li> <li>G. Against the workers morals/ethics</li> </ol> | <p><b>YES</b>.....Skip to 23A</p> <p><b>NO</b></p> <p><b>WHY not?</b><br/><i>(circle all answers indicated)</i></p> <ol style="list-style-type: none"> <li>A. No health workers available</li> <li>B. No trained health workers</li> <li>C. No equipment e.g. machines or beds</li> <li>D. No commodities or supplies</li> <li>E. Against hospital or management policies</li> <li>F. No cases requiring the procedure</li> <li>G. Against the workers morals/ethics</li> </ol> |
| <p><b>YES</b>.....Skip to 24A</p> <p><b>NO</b>.....skip to 23C</p> <p><b>WHY not?</b></p>                                                                                                                                                                                                                                                                                                                                                                                                       | <p><b>YES</b>.....Skip to 24A</p> <p><b>NO</b></p> <p><b>WHY not?</b></p>                                                                                                                                                                                                                                                                                                                                                                                                       |

**(circle all answers indicated)**

1. No health workers available
2. No trained health workers
3. No equipment e.g. machines or beds
4. No commodities or supplies
5. Against hospital or management policies
6. No cases requiring the procedure
7. Against the workers morals/ethics

**YES**.....Skip to 25A

**NO**.....skip to 24C

**WHY not?**

**(circle all answers indicated)**

- A. No health workers available
- B. No trained health workers
- C. No equipment e.g. machines or beds
- D. No commodities or supplies
- E. Against hospital or management policies
- F. No cases requiring the procedure
- G. Against the workers morals/ethics

**(circle all answers indicated)**

1. No health workers available
2. No trained health workers
3. No equipment e.g. machines or beds
4. No commodities or supplies
5. Against hospital or management policies
6. No cases requiring the procedure
7. Against the workers morals/ethics

**YES**.....Skip to 25A

**NO**

**WHY not?**

**(circle all answers indicated)**

- A. No health workers available
- B. No trained health workers
- C. No equipment e.g. machines or beds
- D. No commodities or supplies
- E. Against hospital or management policies
- F. No cases requiring the procedure
- G. Against the workers morals/ethics

**YES**.....Skip to 26A

**NO**.....skip to 25C

**WHY not?**

**(circle all answers indicated)**

- No health workers available
- No trained health workers
- No equipment e.g. machines or beds
- No commodities or supplies
- Against hospital or management policies
- No cases requiring the procedure
- Against the workers morals/ethics

**YES**.....Skip to 26A

**NO**

**WHY not?**

**(circle all answers indicated)**

- No health workers available
- No trained health workers
- No equipment e.g. machines or beds
- No commodities or supplies
- Against hospital or management policies
- No cases requiring the procedure
- Against the workers morals/ethics

**YES**.....Skip to 27A

**NO**.....skip to 26C

**WHY not?**

**(circle all answers indicated)**

- No health workers available
- No trained health workers
- No equipment e.g. machines or beds
- No commodities or supplies
- Against hospital or management policies
- No cases requiring the procedure
- Against the workers morals/ethics

**YES**.....Skip to 27A

**NO**

**WHY not?**

**(circle all answers indicated)**

- No health workers available
- No trained health workers
- No equipment e.g. machines or beds
- No commodities or supplies
- Against hospital or management policies
- No cases requiring the procedure
- Against the workers morals/ethics

**YES**.....Skip to 28A

**NO** .....Skip to 27C

**WHY not?**

**YES**.....Skip to 28A

**NO**

**WHY not?**

**(circle all answers indicated)**

- A. No health workers available
- B. No trained health workers
- C. No equipment e.g. machines or beds
- D. No commodities or supplies
- E. Against hospital or management policies
- F. No cases requiring the procedure
- G. Against the workers morals/ethics

**(circle all answers indicated)**

- A. No health workers available
- B. No trained health workers
- C. No equipment e.g. machines or beds
- D. No commodities or supplies
- E. Against hospital or management policies
- F. No cases requiring the procedure
- G. Against the workers morals/ethics

**YES**.....Skip to 29A

**NO** .....Skip to 28C

**WHY not?**

**(circle all answers indicated)**

- A. No health workers available
- B. No trained health workers
- C. No equipment e.g. machines or beds
- D. No commodities or supplies
- E. Against hospital or management policies
- F. No cases requiring the procedure
- G. Against the workers morals/ethics

**YES**.....Skip to 29A2

**NO**

**WHY not?**

**(circle all answers indicated)**

- A. No health workers available
- B. No trained health workers
- C. No equipment e.g. machines or beds
- D. No commodities or supplies
- E. Against hospital or management policies
- F. No cases requiring the procedure
- G. Against the workers morals/ethics





**Section 2**

**A. Have some of the staff registered at this facility been trained on comprehensive abortion care?**

1 Yes

**B. What cadre of staff underwent training (*Circle appropriate response*)**

a. Doctors

b. Clinical officers

c. Nurses

d. Other (please specify).....

Yes

1  
 1  
 1  
 1

**C. Are there any trained health providers who provide comprehensive abortion care here but do not work full-time at this facility?**

1 Yes

**D. Has any organization provided any equipment or medical commodities to this facility for comprehensive abortion care?**

1 Yes

**E. What kind of equipment/commodities have they provided:**

\_\_\_\_\_  
\_\_\_\_\_

**F. When last were such commodities supplied? (*Select appropriate response*)**

A In the l  
 B In the l  
 C In the  
 D 1 year  
 E Over 1

**G. Have some of the staff registered at this facility been trained by any other NGO's or organizations on comprehensive abortion care?**

1 Yes

**Name of respondent to this section**

\_\_\_\_\_

**Position of respondent to this section in facility**

\_\_\_\_\_

2 No (Then skip to Question 3)

No

2  
 2  
 2  
 2

2 No

2 No(End interview here)

last 1 month  
last 3 months  
last 6 months  
ago  
1 year ago.

2 No

| Q | A. Can your facility perform this procedure?                                           |                                                                                                                                                                                                                                                                                                                                                                                                                                                                                                       |
|---|----------------------------------------------------------------------------------------|-------------------------------------------------------------------------------------------------------------------------------------------------------------------------------------------------------------------------------------------------------------------------------------------------------------------------------------------------------------------------------------------------------------------------------------------------------------------------------------------------------|
|   | Does this facility offer HIV counseling and testing services?                          | <p><b>YES</b>.....Skip to 29B</p> <p><b>NO</b><br/> <b>WHY not?</b><br/> <i>(circle all answers indicated)</i> .....Skip to Section 2</p> <ul style="list-style-type: none"> <li>A. No health workers available</li> <li>B. No trained health workers</li> <li>C. No equipment e.g. machines or beds</li> <li>D. No commodities or supplies</li> <li>E. Against hospital or management policies</li> <li>F. No cases requiring the procedure</li> <li>G. Against the workers morals/ethics</li> </ul> |
|   | Hepatitis B screening?                                                                 | <p><b>YES</b>.....Skip to 30B</p> <p><b>NO</b><br/> <b>WHY not?</b><br/> <i>(circle all answers indicated)</i> .....Skip to Section 2</p> <ul style="list-style-type: none"> <li>A. No health workers available</li> <li>B. No trained health workers</li> <li>C. No equipment e.g. machines or beds</li> <li>D. No commodities or supplies</li> <li>E. Against hospital or management policies</li> <li>F. No cases requiring the procedure</li> <li>G. Against the workers morals/ethics</li> </ul> |
|   | STI (Chlamydia, Gonorrhea, Trichomonas vaginalis, and Syphilis) testing are you asking | <p><b>YES</b>.....Skip to 31B</p> <p><b>NO</b><br/> <b>WHY not?</b><br/> <i>(circle all answers indicated)</i> .....Skip to Section 2</p> <ul style="list-style-type: none"> <li>A. No health workers available</li> <li>B. No trained health workers</li> <li>C. No equipment e.g. machines or beds</li> <li>D. No commodities or supplies</li> </ul>                                                                                                                                                |

about all?  
Or any of  
the above

- E. Against hospital or management policies
- F. No cases requiring the procedure
- G. Against the workers morals/ethics

**Name of respondent to this section:** \_\_\_\_\_

**Position of respondent to this section in facility:** \_\_\_\_\_

**LABORATORY PROCEDURES**

**Is there a laboratory in this facility- Y/N**

B. Has your facility done this in the past 3 months?

C. Has your facility done this in the past 12 months?

**YES**.....Skip to 30A

**YES**.....Skip to 30A

**NO** .....Skip to 29C

**NO**

**WHY not?**

**WHY not?**

*(circle all answers indicated)*

*(circle all answers indicated)*

- A. No health workers available
- B. No trained health workers
- C. No equipment e.g. machines or beds
- D. No commodities or supplies
- E. Against hospital or management policies
- F. No cases requiring the procedure
- G. Against the workers morals/ethics

- A. No health workers available
- B. No trained health workers
- C. No equipment e.g. machines or beds
- D. No commodities or supplies
- E. Against hospital or management policies
- F. No cases requiring the procedure
- G. Against the workers morals/ethics

**YES**.....Skip to 31A

**YES**.....Skip to 31A

**NO** .....Skip to 30C

**NO**

**WHY not?**

**WHY not?**

*(circle all answers indicated)*

*(circle all answers indicated)*

- A. No health workers available
- B. No trained health workers
- C. No equipment e.g. machines or beds
- D. No commodities or supplies
- E. Against hospital or management policies
- F. No cases requiring the procedure
- G. Against the workers morals/ethics

- A. No health workers available
- B. No trained health workers
- C. No equipment e.g. machines or beds
- D. No commodities or supplies
- E. Against hospital or management policies
- F. No cases requiring the procedure
- G. Against the workers morals/ethics

**YES**.....Skip to Section 2

**YES**.....Skip to Section 2

**NO** .....Skip to 31C

**NO**

**WHY not?**

**WHY not?**

*(circle all answers indicated)*

*(circle all answers indicated)*

- 1. No health workers available
- 2. No trained health workers
- 3. No equipment e.g. machines or beds
- 4. No commodities or supplies

- A. No health workers available
- B. No trained health workers
- C. No equipment e.g. machines or beds
- D. No commodities or supplies

5. Against hospital or management policies

6. No cases requiring the procedure

7. Against the workers  
morals/ethics

E. Against hospital or management  
policies

F. No cases requiring the procedure

G. Against the workers morals/ethics

HOSPITAL EQUIPMENT

Section 2

I would like to know if the following items are available in this service area today. For each equipment or item, please tell me if it is available today and functioning?

Reported Available(Circle appropriate response)

|    |                                                                                                                                                                                                                             |                              |                             |
|----|-----------------------------------------------------------------------------------------------------------------------------------------------------------------------------------------------------------------------------|------------------------------|-----------------------------|
| 1  | Private room for examining /counselling women and performing reproductive health procedures                                                                                                                                 | <input type="checkbox"/> Yes | <input type="checkbox"/> No |
| 2  | Water source                                                                                                                                                                                                                | <input type="checkbox"/> Yes | <input type="checkbox"/> No |
| 3  | Electric autoclave/non-electric autoclave/Electric dry heat sterilizer/<br>Electric boiler or steamer/<br>Non-electric pot with cover for boiling/steam /                                                                   | <input type="checkbox"/> Yes | <input type="checkbox"/> No |
| 4  | Vehicle (ambulance or other vehicle) to transfer referred patients                                                                                                                                                          | <input type="checkbox"/> Yes | <input type="checkbox"/> No |
| 5  | Is fuel for the ambulance or other emergency vehicle available today?                                                                                                                                                       | <input type="checkbox"/> Yes | <input type="checkbox"/> No |
| 6  | Functional Landline/Mobile phone supported by the facility                                                                                                                                                                  | <input type="checkbox"/> Yes | <input type="checkbox"/> No |
| 7  | Does your facility have electricity from any source (e.g. electricity grid, generator, solar, or other) including for stand-alone devices (EPI cold chain)?                                                                 | <input type="checkbox"/> Yes | <input type="checkbox"/> No |
| 8  | Is there a toilet (latrine) on premises in <i>functioning condition</i> that is accessible for general outpatient client use? IF YES: What type of toilet? IF MULTIPLE TOILETS ARE AVAILABLE, CONSIDER THE MOST MODERN TYPE | <input type="checkbox"/> Yes | <input type="checkbox"/> No |
| 9  | Ultrasound                                                                                                                                                                                                                  | <input type="checkbox"/> Yes | <input type="checkbox"/> No |
| 10 | Examination light/ Light source (flashlight acceptable)                                                                                                                                                                     | <input type="checkbox"/> Yes | <input type="checkbox"/> No |
| 11 | Delivery bed                                                                                                                                                                                                                | <input type="checkbox"/> Yes | <input type="checkbox"/> No |
| 12 | Stethoscope                                                                                                                                                                                                                 | <input type="checkbox"/> Yes | <input type="checkbox"/> No |
| 13 | Digital or manual sphygmomanometer                                                                                                                                                                                          | <input type="checkbox"/> Yes | <input type="checkbox"/> No |

|    |                                                         |     |    |
|----|---------------------------------------------------------|-----|----|
| 14 | IV fluid (neonatal giving) set/umbilical catheter       | Yes | No |
| 15 | IV fluid giving set (adult)                             | Yes | No |
| 16 | Needles and syringes                                    | Yes | No |
| 17 | Disposable latex gloves                                 | Yes | No |
| 18 | Hand-washing soap/liquid soap                           | Yes | No |
| 19 | Alcohol based hand rub                                  | Yes | No |
| 20 | Sterile theater gowns                                   | Yes | No |
| 21 | Delivery pack                                           | Yes | No |
| 22 | Vacuum extractor with different size cups               | Yes | No |
| 23 | Obstetric forceps                                       | Yes | No |
| 24 | Vaginal speculum (Sims, Cusco)                          | Yes | No |
| 25 | Uristix (dip stick for protein in urine)                | Yes | No |
| 26 | Watch or clock with second hand that can be easily seen | Yes | No |
| 27 | Blood sugar testing sticks                              | Yes | No |
| 28 | Cord clamp                                              | Yes | No |
| 29 | 4% CHORHEXIDINE SOLUTION (UMBILICAL CORD                | Yes | No |
| 30 | Infant weighing scale                                   | Yes | No |
| 31 | Towels or cloth for newborn                             | Yes | No |
| 32 | Small cup for breast milk expression                    | Yes | No |
| 33 | Mucus extractor                                         | Yes | No |
| 34 | Resuscitation table with heat source for newborn        | Yes | No |
| 35 | Incubator                                               | Yes | No |
| 36 | Infant face masks, sizes 0, 1, 2                        | Yes | No |



|    |                                                      |                              |                                       |
|----|------------------------------------------------------|------------------------------|---------------------------------------|
| 37 | Ambu (ventilatory) bag                               | <input type="checkbox"/> Yes | <input type="checkbox"/> No           |
| 38 | Suction catheter, 10, 12 Ch                          | <input type="checkbox"/> Yes | <input type="checkbox"/> No           |
| 39 | Suction aspirator (operated by foot or electrically) | <input type="checkbox"/> Yes | <input type="checkbox"/> No           |
| 40 | Infant laryngoscope with spare bulb and batteries    | <input type="checkbox"/> Yes | <input type="checkbox"/> No           |
| 41 | Endotracheal tubes, 3.5, 3.0                         | <input type="checkbox"/> Yes | <input type="checkbox"/> No           |
| 42 | Disposable uncuffed tracheal tubes, sizes 2.0 to 3.5 | <input type="checkbox"/> Yes | <input type="checkbox"/> No           |
| 43 | Mucus trap for suction                               | <input type="checkbox"/> Yes | <input type="checkbox"/> No           |
| 44 | Vacuum aspirator kit/syringes                        | <input type="checkbox"/> Yes | <input type="checkbox"/> No           |
|    | Dilatation and Curettage (D&C) kit                   |                              |                                       |
| 45 | Vaginal speculum, (Sims)                             | <input type="checkbox"/> Yes | <input type="checkbox"/> No           |
| 46 | Sponge (ring) forceps                                | <input type="checkbox"/> Yes | <input type="checkbox"/> No           |
| 47 | Dissecting forceps, serrated jaws 250mm S/S          | <input type="checkbox"/> Yes | <input type="checkbox"/> No           |
| 48 | Towel clip                                           | <input type="checkbox"/> Yes | <input type="checkbox"/> No           |
| 49 | Ovum forceps                                         | <input type="checkbox"/> Yes | <input type="checkbox"/> No           |
| 50 | Uterine forceps, 3x4 teeth, curved, S/S              | <input type="checkbox"/> Yes | <input type="checkbox"/> No           |
| 51 | Uterine forceps, S/S                                 | <input type="checkbox"/> Yes | <input type="checkbox"/> No           |
| 52 | Uterine dilators, sizes 13-27                        | <input type="checkbox"/> Yes | <input type="checkbox"/> No           |
| 53 | Sharp uterine curettes                               | <input type="checkbox"/> Yes | <input type="checkbox"/> No           |
| 54 | Blunt uterine curettes                               | <input type="checkbox"/> Yes | <input type="checkbox"/> No           |
| 55 | Uterine sound                                        | <input type="checkbox"/> Yes | <input type="checkbox"/> No           |
|    | Functional operating theatre                         | <input type="checkbox"/> Yes | <input type="checkbox"/> No (if no sk |
|    | Laparotomy/Caesarean kit                             | <input type="checkbox"/> Yes | <input type="checkbox"/> No           |

|    |                                               |     |    |
|----|-----------------------------------------------|-----|----|
| 56 | Stainless steel instrument tray with cover    | Yes | No |
| 57 | Towel clips                                   | Yes | No |
| 58 | Sponge (ring) forceps                         | Yes | No |
| 59 | Straight artery forceps                       | Yes | No |
| 60 | Uterine hemostasis forceps                    | Yes | No |
| 61 | Needle holder                                 | Yes | No |
| 62 | Surgical knife handle, No. 3 or 4             | Yes | No |
| 63 | Surgical knife blades                         | Yes | No |
| 64 | Triangular point suture needles, 7.3cm/size 6 | Yes | No |
| 65 | Round-bodied needles, No. 12/size 6           | Yes | No |
| 66 | Abdominal retractor                           | Yes | No |
| 67 | Abdominal retractors, double-ended            | Yes | No |
| 68 | Operating scissors, curved                    | Yes | No |
| 69 | Operating scissors, straight                  | Yes | No |
| 70 | Scissors, straight,                           | Yes | No |
| 71 | Suction nozzle                                | Yes | No |
| 72 | Suction tube, 22.5cm, 23 French gauge         | Yes | No |
| 73 | Intestinal clamps, curved, 22.5cm             | Yes | No |
| 74 | Intestinal clamps, straight, 22.5cm           | Yes | No |
| 75 | Dressing (tissue) forceps, non-toothed,       | Yes | No |
| 76 | Sutures (different sizes and types)           | Yes | No |
| 77 | Mini-laparotomy kit                           | Yes | No |
|    | Anaesthesia equipment                         | Yes | No |
| 78 | Anesthetic face masks                         | Yes | No |

|                                                     |                                                                                                                 |                              |                             |
|-----------------------------------------------------|-----------------------------------------------------------------------------------------------------------------|------------------------------|-----------------------------|
| 79                                                  | Oropharyngeal airways                                                                                           | <input type="checkbox"/> Yes | <input type="checkbox"/> No |
| 80                                                  | Laryngoscopes with spare bulbs and batteries                                                                    | <input type="checkbox"/> Yes | <input type="checkbox"/> No |
| 81                                                  | Endotracheal tubes with cuffs, 8mm                                                                              | <input type="checkbox"/> Yes | <input type="checkbox"/> No |
| 82                                                  | Endotracheal tubes with cuffs, 10mm                                                                             | <input type="checkbox"/> Yes | <input type="checkbox"/> No |
| 83                                                  | Intubating forceps                                                                                              | <input type="checkbox"/> Yes | <input type="checkbox"/> No |
| 84                                                  | Endotracheal tube connectors, plastic, 15 mm<br>(connect directly to breathing valve; three for each tube size) | <input type="checkbox"/> Yes | <input type="checkbox"/> No |
| 85                                                  | Spinal needles, 18 gauge to 25 gauge                                                                            | <input type="checkbox"/> Yes | <input type="checkbox"/> No |
| 86                                                  | Suction aspirator, foot-operated                                                                                | <input type="checkbox"/> Yes | <input type="checkbox"/> No |
| 87                                                  | Suction aspirator, electric                                                                                     | <input type="checkbox"/> Yes | <input type="checkbox"/> No |
| 88                                                  | Anesthetic vaporizers (draw-over system)                                                                        | <input type="checkbox"/> Yes | <input type="checkbox"/> No |
| 89                                                  | Oxygen cylinders with manometer and flowmeter<br>(low flow) tubes and connectors                                | <input type="checkbox"/> Yes | <input type="checkbox"/> No |
| 90                                                  | Cannula and Trochar for implant                                                                                 | <input type="checkbox"/> Yes | <input type="checkbox"/> No |
| Name of respondent to this section:                 |                                                                                                                 | _____                        |                             |
| Position of respondent to this section in facility: |                                                                                                                 | _____                        |                             |



|     |    |  |  |  |
|-----|----|--|--|--|
| Yes | No |  |  |  |
| Yes | No |  |  |  |
| Yes | No |  |  |  |
| Yes | No |  |  |  |
| Yes | No |  |  |  |
| Yes | No |  |  |  |
| Yes | No |  |  |  |
| Yes | No |  |  |  |
| Yes | No |  |  |  |
| Yes | No |  |  |  |
| Yes | No |  |  |  |
| Yes | No |  |  |  |
| Yes | No |  |  |  |
| Yes | No |  |  |  |
| Yes | No |  |  |  |
| Yes | No |  |  |  |
| Yes | No |  |  |  |
| Yes | No |  |  |  |
| Yes | No |  |  |  |
| Yes | No |  |  |  |
| Yes | No |  |  |  |
| Yes | No |  |  |  |

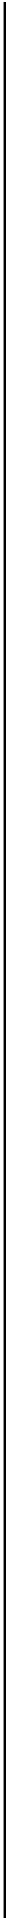

|     |    |  |  |  |
|-----|----|--|--|--|
| Yes | No |  |  |  |
|-----|----|--|--|--|

|     |    |  |  |  |
|-----|----|--|--|--|
| Yes | No |  |  |  |
|-----|----|--|--|--|

|     |    |  |  |  |
|-----|----|--|--|--|
| Yes | No |  |  |  |
|-----|----|--|--|--|

|     |    |  |  |  |
|-----|----|--|--|--|
| Yes | No |  |  |  |
|-----|----|--|--|--|

|     |    |  |  |  |
|-----|----|--|--|--|
| Yes | No |  |  |  |
|-----|----|--|--|--|

|     |    |  |  |  |
|-----|----|--|--|--|
| Yes | No |  |  |  |
|-----|----|--|--|--|

|     |    |  |  |  |
|-----|----|--|--|--|
| Yes | No |  |  |  |
|-----|----|--|--|--|

|     |    |  |  |  |
|-----|----|--|--|--|
| Yes | No |  |  |  |
|-----|----|--|--|--|

|     |    |  |  |  |
|-----|----|--|--|--|
| Yes | No |  |  |  |
|-----|----|--|--|--|

|     |    |  |  |  |
|-----|----|--|--|--|
| Yes | No |  |  |  |
|-----|----|--|--|--|

|     |    |  |  |  |
|-----|----|--|--|--|
| Yes | No |  |  |  |
|-----|----|--|--|--|

|     |    |  |  |  |
|-----|----|--|--|--|
| Yes | No |  |  |  |
|-----|----|--|--|--|

|     |    |  |  |  |
|-----|----|--|--|--|
| Yes | No |  |  |  |
|-----|----|--|--|--|

|     |    |  |  |  |
|-----|----|--|--|--|
| Yes | No |  |  |  |
|-----|----|--|--|--|

|     |    |  |  |  |
|-----|----|--|--|--|
| Yes | No |  |  |  |
|-----|----|--|--|--|

|     |    |  |  |  |
|-----|----|--|--|--|
| Yes | No |  |  |  |
|-----|----|--|--|--|

|     |    |  |  |  |
|-----|----|--|--|--|
| Yes | No |  |  |  |
|-----|----|--|--|--|

|     |    |  |  |  |
|-----|----|--|--|--|
| Yes | No |  |  |  |
|-----|----|--|--|--|

|     |    |  |  |  |
|-----|----|--|--|--|
| Yes | No |  |  |  |
|-----|----|--|--|--|

ip to section 3)

|     |  |  |  |  |
|-----|--|--|--|--|
| Yes |  |  |  |  |
|-----|--|--|--|--|

\_\_\_\_\_



|     |    |                          |                          |
|-----|----|--------------------------|--------------------------|
| Yes | No | <input type="checkbox"/> | <input type="checkbox"/> |
|-----|----|--------------------------|--------------------------|

|     |    |                          |                          |                          |
|-----|----|--------------------------|--------------------------|--------------------------|
| Yes | No | <input type="checkbox"/> | <input type="checkbox"/> | <input type="checkbox"/> |
|-----|----|--------------------------|--------------------------|--------------------------|

|     |    |                          |                          |                          |
|-----|----|--------------------------|--------------------------|--------------------------|
| Yes | No | <input type="checkbox"/> | <input type="checkbox"/> | <input type="checkbox"/> |
|-----|----|--------------------------|--------------------------|--------------------------|

|     |    |                          |                          |                          |
|-----|----|--------------------------|--------------------------|--------------------------|
| Yes | No | <input type="checkbox"/> | <input type="checkbox"/> | <input type="checkbox"/> |
|-----|----|--------------------------|--------------------------|--------------------------|

|     |    |                          |                          |                          |
|-----|----|--------------------------|--------------------------|--------------------------|
| Yes | No | <input type="checkbox"/> | <input type="checkbox"/> | <input type="checkbox"/> |
|-----|----|--------------------------|--------------------------|--------------------------|

|     |    |                          |                          |                          |
|-----|----|--------------------------|--------------------------|--------------------------|
| Yes | No | <input type="checkbox"/> | <input type="checkbox"/> | <input type="checkbox"/> |
|-----|----|--------------------------|--------------------------|--------------------------|

|     |    |                          |                          |                          |
|-----|----|--------------------------|--------------------------|--------------------------|
| Yes | No | <input type="checkbox"/> | <input type="checkbox"/> | <input type="checkbox"/> |
|-----|----|--------------------------|--------------------------|--------------------------|

|     |    |                          |                          |                          |
|-----|----|--------------------------|--------------------------|--------------------------|
| Yes | No | <input type="checkbox"/> | <input type="checkbox"/> | <input type="checkbox"/> |
|-----|----|--------------------------|--------------------------|--------------------------|

|     |    |                          |                          |                          |
|-----|----|--------------------------|--------------------------|--------------------------|
| Yes | No | <input type="checkbox"/> | <input type="checkbox"/> | <input type="checkbox"/> |
|-----|----|--------------------------|--------------------------|--------------------------|

|     |    |                          |                          |                          |
|-----|----|--------------------------|--------------------------|--------------------------|
| Yes | No | <input type="checkbox"/> | <input type="checkbox"/> | <input type="checkbox"/> |
|-----|----|--------------------------|--------------------------|--------------------------|

|     |    |                          |                          |                          |
|-----|----|--------------------------|--------------------------|--------------------------|
| Yes | No | <input type="checkbox"/> | <input type="checkbox"/> | <input type="checkbox"/> |
|-----|----|--------------------------|--------------------------|--------------------------|

|     |    |                          |                          |                          |
|-----|----|--------------------------|--------------------------|--------------------------|
| Yes | No | <input type="checkbox"/> | <input type="checkbox"/> | <input type="checkbox"/> |
|-----|----|--------------------------|--------------------------|--------------------------|

---

---

---

---



| <b>Section 3</b>                                                                                |                                                                                                                                                                                                                                                                                                                                                                                                            |                              |                             |                              |
|-------------------------------------------------------------------------------------------------|------------------------------------------------------------------------------------------------------------------------------------------------------------------------------------------------------------------------------------------------------------------------------------------------------------------------------------------------------------------------------------------------------------|------------------------------|-----------------------------|------------------------------|
| <b>Are any of the following medicines and commodities available in this service site today?</b> |                                                                                                                                                                                                                                                                                                                                                                                                            | <b>1. Never available</b>    |                             | <b>2. Not a</b>              |
| 1                                                                                               | Mifepristone and misoprostol combination..                                                                                                                                                                                                                                                                                                                                                                 | <input type="checkbox"/> Yes | <input type="checkbox"/> No | <input type="checkbox"/> Yes |
| 2                                                                                               | Misoprostol alone                                                                                                                                                                                                                                                                                                                                                                                          | <input type="checkbox"/> Yes | <input type="checkbox"/> No | <input type="checkbox"/> Yes |
| 3                                                                                               | Other abortifacient (specify)....                                                                                                                                                                                                                                                                                                                                                                          | <input type="checkbox"/> Yes | <input type="checkbox"/> No | <input type="checkbox"/> Yes |
| 4                                                                                               | Injectable uterotonic (e.g. oxytocin)                                                                                                                                                                                                                                                                                                                                                                      | <input type="checkbox"/> Yes | <input type="checkbox"/> No | <input type="checkbox"/> Yes |
| 5                                                                                               | Magnesium sulphate injection                                                                                                                                                                                                                                                                                                                                                                               | <input type="checkbox"/> Yes | <input type="checkbox"/> No | <input type="checkbox"/> Yes |
| 6                                                                                               | Do you have any other anticonvulsants such as- diazepam injection, Phenobarbital (injection), Phenytoin (Diphenylhydantoin)                                                                                                                                                                                                                                                                                | <input type="checkbox"/> Yes | <input type="checkbox"/> No | <input type="checkbox"/> Yes |
| 7                                                                                               | Do you have steroids usually administered to women who have preterm labor such as-Betamethasone injection, Dexamethasone injection                                                                                                                                                                                                                                                                         | <input type="checkbox"/> Yes | <input type="checkbox"/> No | <input type="checkbox"/> Yes |
| 8                                                                                               | Do you have any of these antibiotics-Amoxicillin, ampicillin, azithromycin, Cephazoline sodium, Co-trimoxazole cap/tab (Oral antibiotic), Cefixime, Ceftriaxone, Cefotaxime injection (for newborn), Chloramphenicol (injection), Ciprofloxacin, Clindamycin, Cloxacillin sodium, Doxycycline, Erythromycin, Metronidazole (injection), Penicillin G (Benzyl), Trimethoprim/sulfamethoxazole, Tetracycline | <input type="checkbox"/> Yes | <input type="checkbox"/> No | <input type="checkbox"/> Yes |
| 9                                                                                               | Benzathine benzyl penicillin powder for injection                                                                                                                                                                                                                                                                                                                                                          | <input type="checkbox"/> Yes | <input type="checkbox"/> No | <input type="checkbox"/> Yes |
| 10                                                                                              | Oral flucloxacillin (for newborn)                                                                                                                                                                                                                                                                                                                                                                          | <input type="checkbox"/> Yes | <input type="checkbox"/> No | <input type="checkbox"/> Yes |
| 11                                                                                              | Gentamicin (injection)                                                                                                                                                                                                                                                                                                                                                                                     | <input type="checkbox"/> Yes | <input type="checkbox"/> No | <input type="checkbox"/> Yes |
| 12                                                                                              | Tetracycline eye ointment/drops                                                                                                                                                                                                                                                                                                                                                                            | <input type="checkbox"/> Yes | <input type="checkbox"/> No | <input type="checkbox"/> Yes |
| 13                                                                                              | Halothane                                                                                                                                                                                                                                                                                                                                                                                                  | <input type="checkbox"/> Yes | <input type="checkbox"/> No | <input type="checkbox"/> Yes |
| 14                                                                                              | Ketamine                                                                                                                                                                                                                                                                                                                                                                                                   | <input type="checkbox"/> Yes | <input type="checkbox"/> No | <input type="checkbox"/> Yes |

|    |                                                 |     |    |     |
|----|-------------------------------------------------|-----|----|-----|
| 15 | Lignocaine/Lidocaine 2% or 1%                   | Yes | No | Yes |
| 16 | Dextrose                                        | Yes | No | Yes |
| 17 | Dextran                                         | Yes | No | Yes |
| 18 | Glucose infusion 5%                             | Yes | No | Yes |
| 19 | Normal saline                                   | Yes | No | Yes |
| 20 | Ringer's lactate                                | Yes | No | Yes |
| 21 | Nevirapine (for mother)                         | Yes | No | Yes |
| 22 | Nevirapine (for newborn)                        | Yes | No | Yes |
| 23 | Post-HIV exposure prophylactic treatment        | Yes | No | Yes |
| 24 | Combined ARVs for mother                        | Yes | No | Yes |
| 25 | Combined ARVs for newborn                       | Yes | No | Yes |
| 26 | Hepatitis B immunization                        | Yes | No | Yes |
| 27 | Combined oral contraceptive pills               | Yes | No | Yes |
| 28 | Progestin-only contraceptive pills              | Yes | No | Yes |
| 29 | Combined injectable contraceptives              | Yes | No | Yes |
| 30 | Progestin-only injectable contraceptives (Depo) | Yes | No | Yes |
| 31 | Male condoms                                    | Yes | No | Yes |
| 32 | Female condoms                                  | Yes | No | Yes |
| 33 | Intrauterine contraceptive device (IUCD)        | Yes | No | Yes |
| 34 | Implant                                         | Yes | No | Yes |
| 35 | Emergency contraceptive pills                   | Yes | No | Yes |
| 36 | Syphilis rapid test kit                         | Yes | No | Yes |
| 37 | HIV rapid test kit                              | Yes | No | Yes |
| 38 | Urine pregnancy test kit                        | Yes | No | Yes |

Time Interview ended

|   |   |   |   |     |
|---|---|---|---|-----|
| H | H | : | M | A/P |
|---|---|---|---|-----|

A. Duration of time the interview took:

|                      |       |                      |         |
|----------------------|-------|----------------------|---------|
| <input type="text"/> | Hours | <input type="text"/> | Minutes |
|----------------------|-------|----------------------|---------|

Interview information sheet- TO BE FILLED IN IMMEDIATELY AFTER THE INTERVIEW IS COMPLETED





M

s

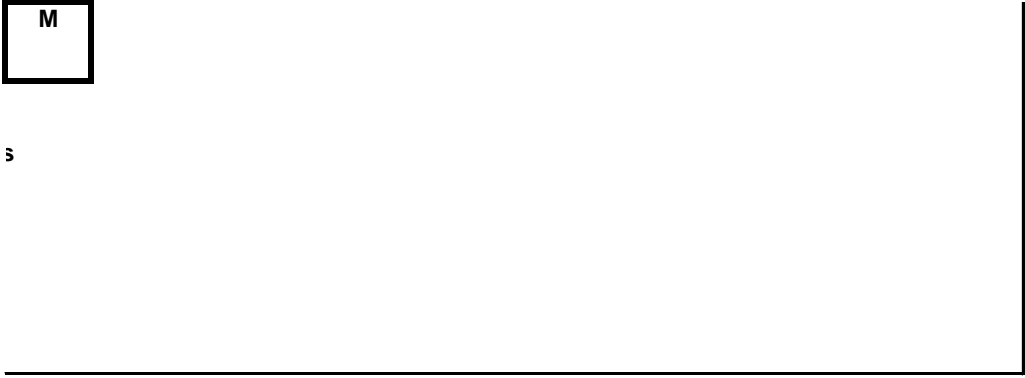

Supplement: MOESM1 [file 20334518]
